# Supplementary material for: Designing antiperovskite derivatives via atomic-position splitting for photovoltaic applications
Source: Royal Society of Chemistry journal article supplement (doi:10.1039/d4mh00526k), 2024-01-01
Supplement: d4mh00526k1.pdf [file d4mh00526k1.pdf]

## Supporting Information

# Designing Antiperovskite Derivatives via Atomic-Position Splitting for Photovoltaic Applications

Gang Tang<sup>1,2,\*</sup>, Xiaohan Liu<sup>1</sup>, Shihao Wang<sup>1</sup>, Tao Hu<sup>4</sup>, Chunbao Feng<sup>4</sup>, Cheng Zhu<sup>1</sup>, Bonan Zhu<sup>3</sup>, Jiawang Hong<sup>2,3,#</sup>

<sup>1</sup>*Advanced Research Institute of Multidisciplinary Science, Beijing Institute of Technology, Beijing 100081, China*

<sup>2</sup>*Beijing Institute of Technology, Zhuhai Beijing Institute of Technology (BIT) Zhuhai 519088, P.R.China*

<sup>3</sup>*School of Aerospace Engineering, Beijing Institute of Technology, Beijing, 100081, China*

<sup>4</sup>*School of Science, Chongqing University of Posts and Telecommunications, Chongqing 400065, China*

E-mails:

\*Gang Tang: gtang@bit.edu.cn or gangtang@outlook.com;

#Jiawang Hong: hongjw@bit.edu.cn.

## **S1 Ground-State Crystal Structure**

For the cubic phase of antiperovskite derivatives, the presence of imaginary frequencies in the phonon dispersion curves corresponds to structural instabilities and indicates a lower symmetry ground state. To stabilize these unstable modes, we adopted the approach of freezing individual or pairs of unstable phonon modes<sup>1,2</sup>. Specifically, we displaced the atoms according to the force constant eigenvectors and created a pool of subgroup structures. Each of the obtained subgroup structures was then subjected to a full structural relaxation. Subsequently, the lowest energy structure was selected for phonon calculations to further check for additional imaginary modes. This process was repeated iteratively until phonon dispersion curves without imaginary frequencies were achieved.

## **S2 Machine Learning (ML) Procedures**

### **S2.1 Compositional Descriptors and Feature Engineering**

The descriptors used for training the ML model were automatically generated from the chemical compositions using a composition-based feature vector (CBFV) approach<sup>3</sup>. The CBFV is a widely adopted method for transforming chemical compositions into usable features and is generated from the descriptive statistics (such as maximum, minimum, composition-weighted average) of a compound's constituent element properties. Finally, a total of 264 descriptors were generated to construct the initial descriptor set (see Table S6) for ML.

To reduce the dimension of the descriptor set and avoid overfitting, feature engineering is a crucial step to improve the fitting accuracy and performance of the ML model. Initially, we employed the analysis of variance (ANOVA) method<sup>4</sup> from the scikit-learn package<sup>5</sup> to eliminate all features whose variance falls below a predefined threshold (threshold = 0.01). Subsequently, the Pearson correlation coefficients<sup>6</sup> ( $\rho$ ) were calculated for each feature pair to identify and remove

redundant raw features. Redundant descriptors were defined as those with  $|\rho| \geq 0.90$ . Lastly, we utilized the sequential forward selection (SFS) technique from the mlxtend package<sup>7</sup> to further obtain the optimal set of descriptors (see Figure S21a and c).

## S2.2 ML Model Selection

We chose the eXtreme Gradient Boosting (XGBoost) algorithm<sup>8</sup> as the ML regression model in our work due to its accuracy, efficiency, and ease of use. Currently, XGBoost-based ML models have demonstrated excellent accuracy in predicting various material properties, such as electrocaloric temperature change<sup>9</sup>, gas separation selectivity<sup>10</sup>, perovskite catalytic properties<sup>11</sup>, Debye temperature<sup>12</sup>, and thermal conductivity<sup>13</sup>. The Bayesian optimization algorithm in the BayesianOptimization package<sup>14</sup> was used to optimize hyperparameters with five-fold cross-validation (see Table S7). The optimal parameters were determined based on the highest  $R^2$  (the coefficient of determination) value achieved, with over 500 steps of Bayesian optimization performed. Additionally, the loss function of the XGBoost model for  $E_{\text{null}}$  and  $E_g$ , showing the training and validation performance over iterations, is presented in Figure S21b and d.

To perform symbolic regression, we adopted the SISSO (Sure Independence Screening and Sparsifying Operator) algorithm<sup>15</sup>, which combines sure independence screening (SIS) with the sparsifying operator (SO) to select a subspace of descriptors with the largest linear correlation with the targeted property. For establishing the feature spaces, we utilized the set of algebraic and functional operators given in the following:

$$H^{(m)} \equiv \{+, -, \times, \div, \sqrt{\quad}, \exp, ^{-1}, ^2, ^3, ^4\} \quad (1)$$

### S2.3 ML Model performance evaluation

The ML models from the five-fold cross-validation method were evaluated using two metrics: the root mean square error (RMSE) and the coefficient of determination ( $R^2$ ). These metrics are defined as follows:

$$RMSE = \sqrt{\frac{1}{n} \sum_{i=1}^n (y_i - y_{i\_pre})^2} \quad (2)$$

$$R^2 = 1 - \frac{\sum_{i=1}^n y_i - y_{i\_pre}}{\sum_{i=1}^n y_i - \bar{y}} \quad (3)$$

where  $y_i$  and  $y_{i\_pre}$  are the real value and predicted result of the sample  $i$ , respectively, and  $\bar{y}$  is the average of all the real values.

### S2.4 Interpretation of the ML Model

To explain the output of the XGBoost ML model, we performed a SHAP (SHapley Additive exPlanations)<sup>16</sup> analysis, which is a game theoretic approach. This analysis combines feature importance with feature effects, showing the distribution of the Shapley values for each feature. Shapley values assign a value to each feature in a prediction, indicating how much each feature contributes to the difference between the model prediction and the expected prediction.

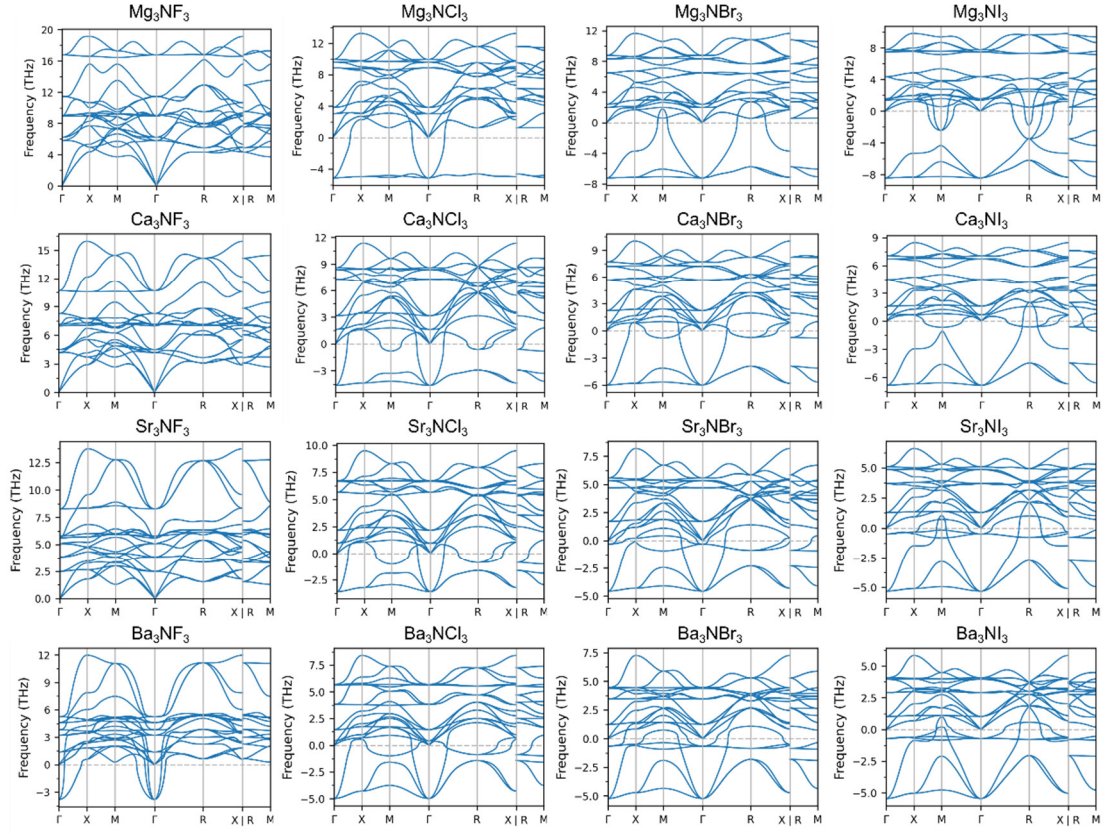

**Figure S1.** Phonon dispersion curves for the  $Pm\text{-}3m$  phase of  $X_3NA'_3$  ( $X = \text{Mg}^{2+}$ ,  $\text{Ca}^{2+}$ ,  $\text{Sr}^{2+}$ ,  $\text{Ba}^{2+}$  and  $A' = \text{F}^-$ ,  $\text{Cl}^-$ ,  $\text{Br}^-$ ,  $\text{I}^-$ ).

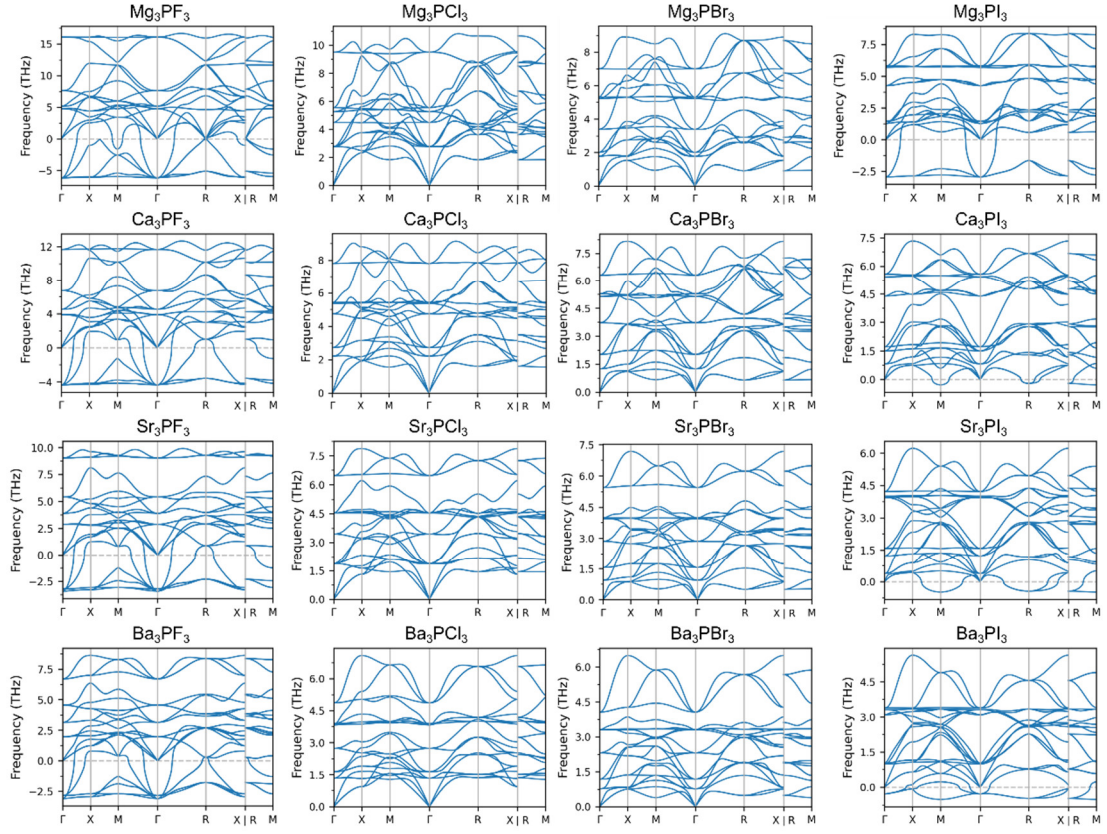

**Figure S2.** Phonon dispersion curves for the  $Pm\text{-}3m$  phase of  $X_3PA'_3$  ( $X = \text{Mg}^{2+}$ ,  $\text{Ca}^{2+}$ ,  $\text{Sr}^{2+}$ ,  $\text{Ba}^{2+}$  and  $A' = \text{F}^-$ ,  $\text{Cl}^-$ ,  $\text{Br}^-$ ,  $\text{I}^-$ ).

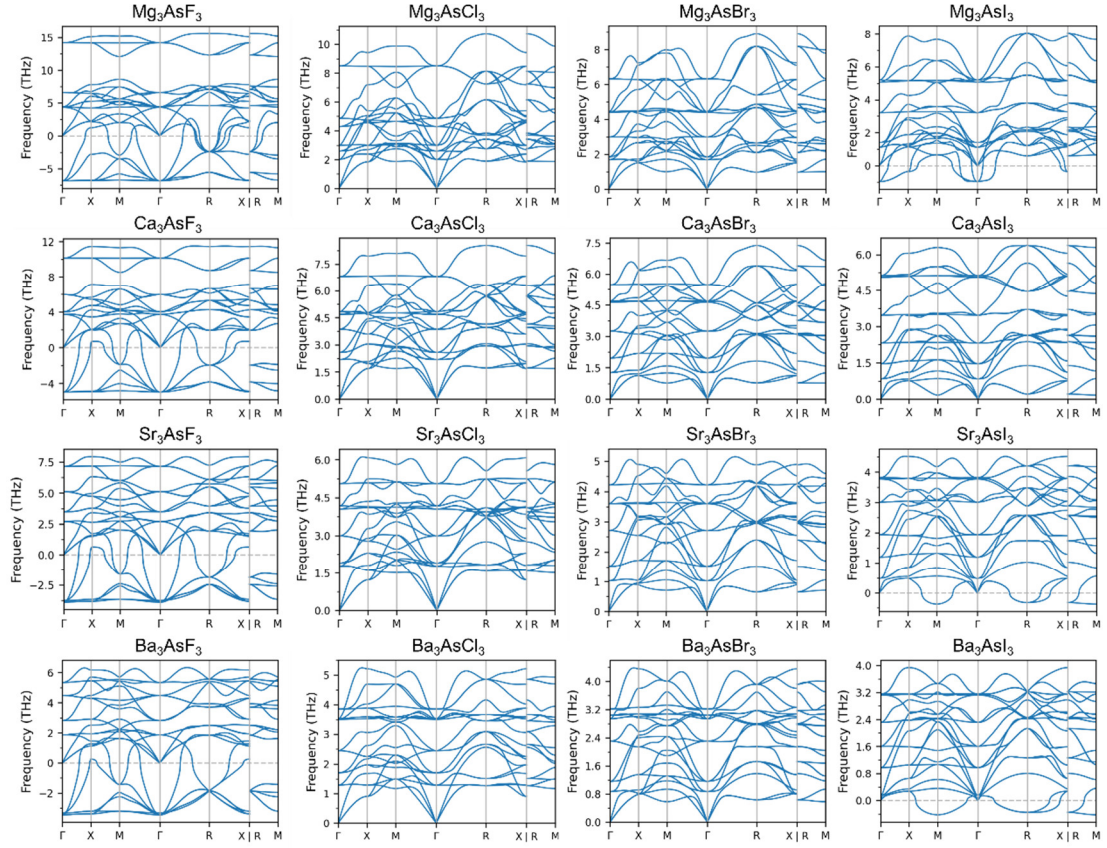

**Figure S3.** Phonon dispersion curves for the  $Pm\text{-}3m$  phase of  $X_3AsA'_3$  ( $X = Mg^{2+}$ ,  $Ca^{2+}$ ,  $Sr^{2+}$ ,  $Ba^{2+}$  and  $A' = F, Cl, Br, I$ ).

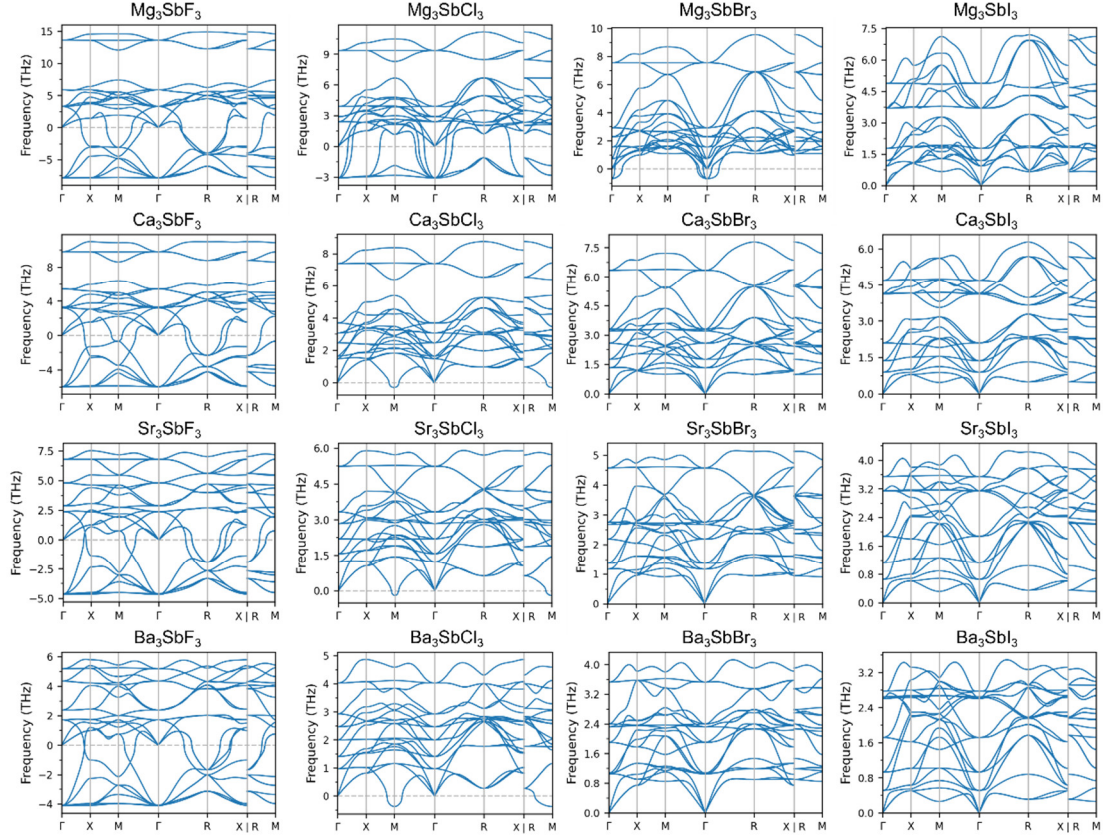

**Figure S4.** Phonon dispersion curves for the  $Pm\text{-}3m$  phase of  $X_3\text{SbA}'_3$  ( $X = \text{Mg}^{2+}$ ,  $\text{Ca}^{2+}$ ,  $\text{Sr}^{2+}$ ,  $\text{Ba}^{2+}$  and  $A' = \text{F}$ ,  $\text{Cl}$ ,  $\text{Br}$ ,  $\text{I}$ ).



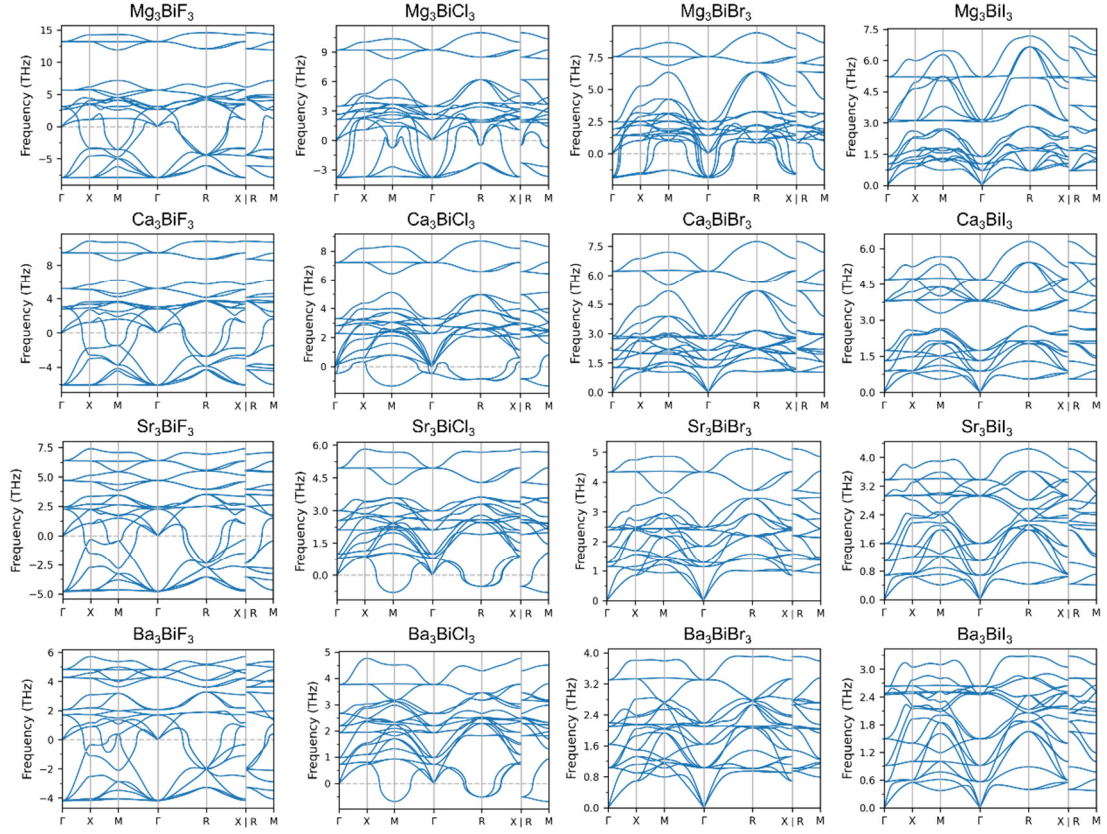

**Figure S5.** Phonon dispersion curves for the  $Pm\text{-}3m$  phase of  $X_3\text{BiA}'_3$  ( $X = \text{Mg}^{2+}$ ,  $\text{Ca}^{2+}$ ,  $\text{Sr}^{2+}$ ,  $\text{Ba}^{2+}$  and  $A' = \text{F}$ ,  $\text{Cl}$ ,  $\text{Br}$ ,  $\text{I}$ ).

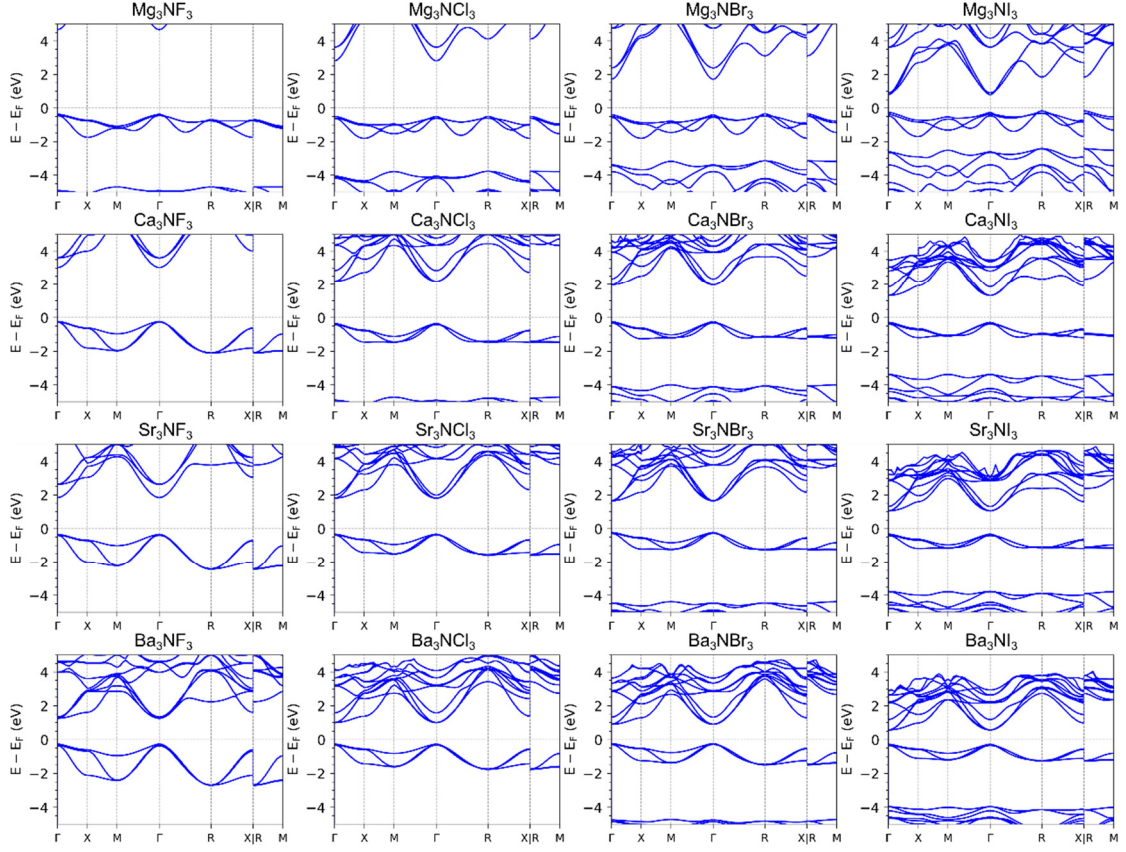

**Figure S6.** Calculated band structures for the  $Pm\text{-}3m$  phase of  $X_3NA'_3$  ( $X = \text{Mg}^{2+}, \text{Ca}^{2+}, \text{Sr}^{2+}, \text{Ba}^{2+}$  and  $A' = \text{F}^-, \text{Cl}^-, \text{Br}^-, \text{I}^-$ ), using the HSE06+SOC method.

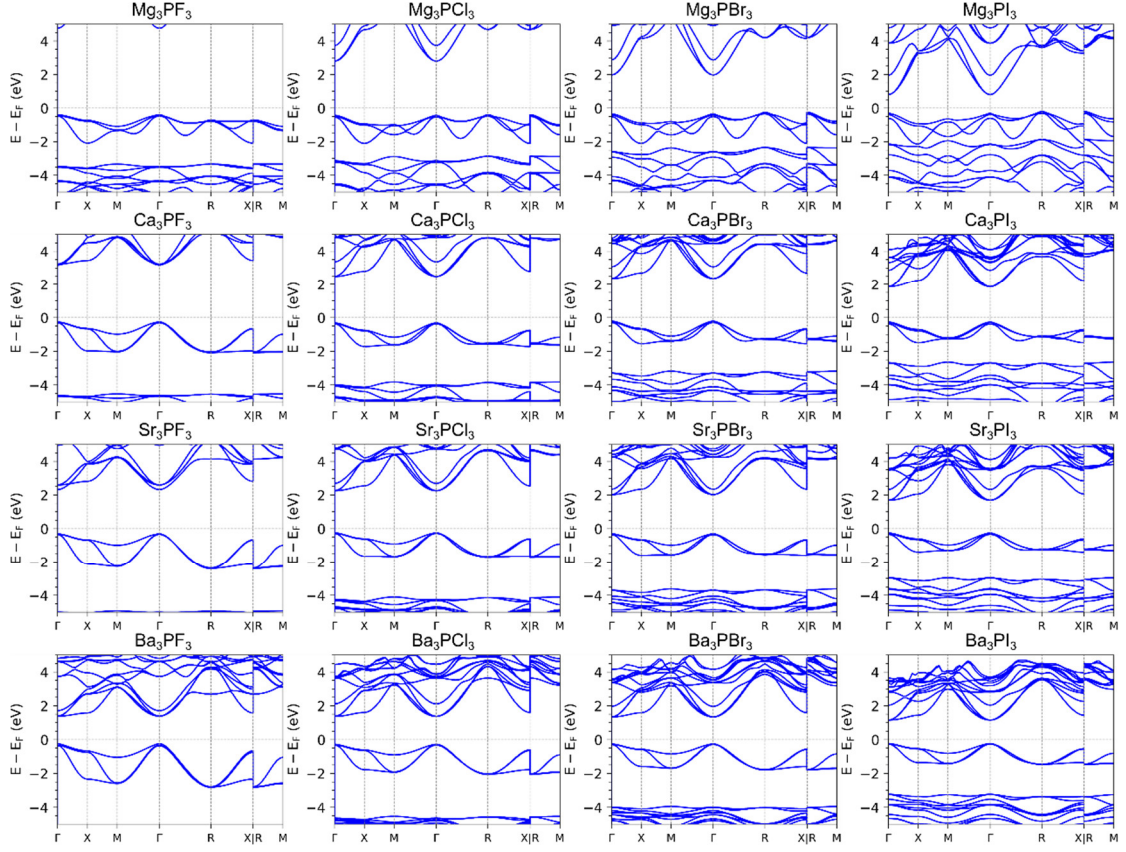

**Figure S7.** Calculated band structures for the  $Pm\text{-}3m$  phase of  $X_3PA'_3$  ( $X = \text{Mg}^{2+}$ ,  $\text{Ca}^{2+}$ ,  $\text{Sr}^{2+}$ ,  $\text{Ba}^{2+}$  and  $A' = \text{F}^-$ ,  $\text{Cl}^-$ ,  $\text{Br}^-$ ,  $\text{I}^-$ ), using the HSE06+SOC method.

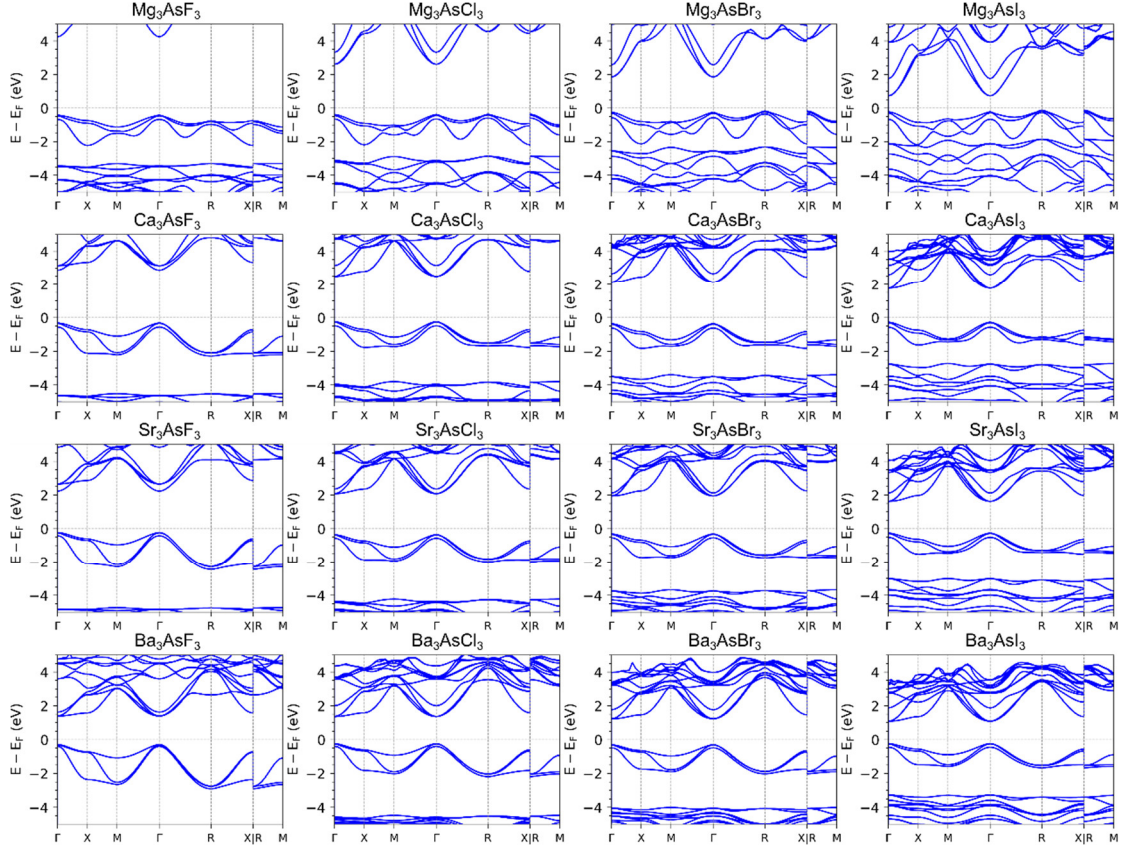

**Figure S8.** Calculated band structures for the  $Pm-3m$  phase of  $X_3AsA'_3$  ( $X = Mg^{2+}$ ,  $Ca^{2+}$ ,  $Sr^{2+}$ ,  $Ba^{2+}$  and  $A' = F^-$ ,  $Cl^-$ ,  $Br^-$ ,  $I^-$ ), using the HSE06+SOC method.

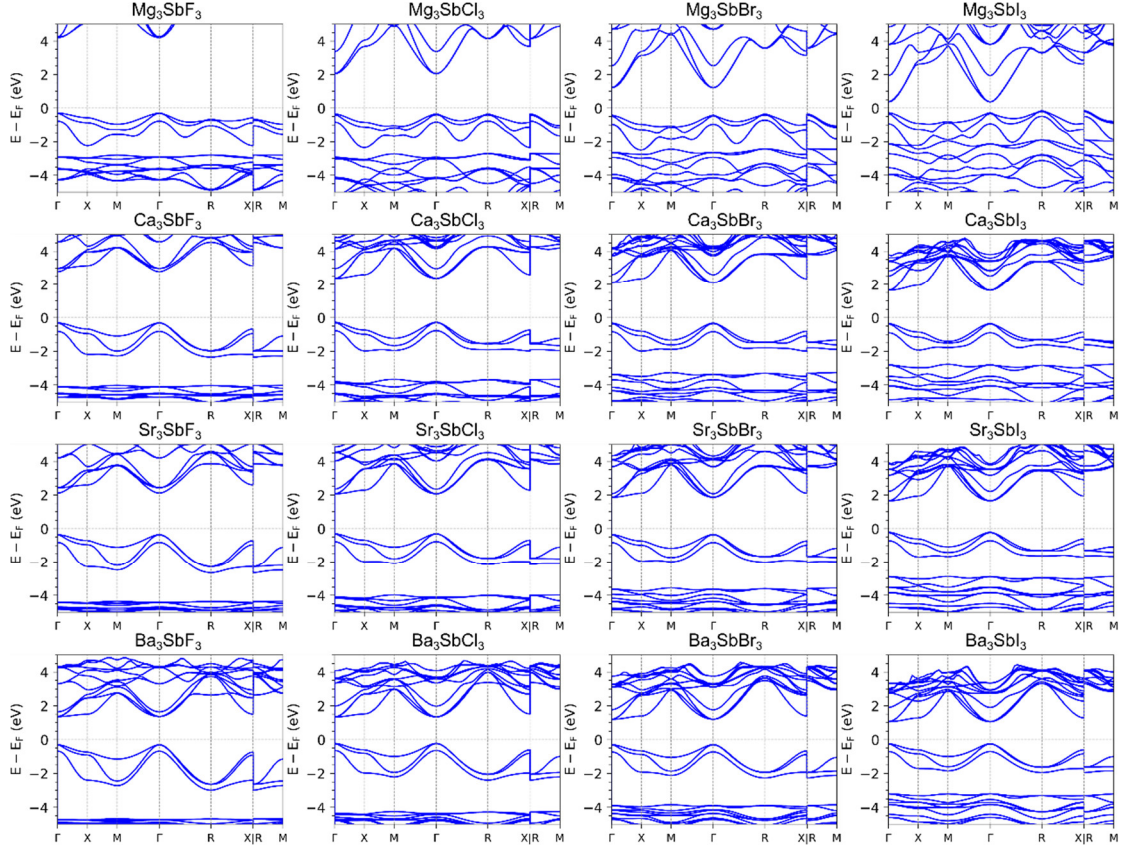

**Figure S9.** Calculated band structures for the  $Pm-3m$  phase of  $X_3SbA'_3$  ( $X = Mg^{2+}, Ca^{2+}, Sr^{2+}, Ba^{2+}$  and  $A' = F^-, Cl^-, Br^-, I^-$ ), using the HSE06+SOC method.

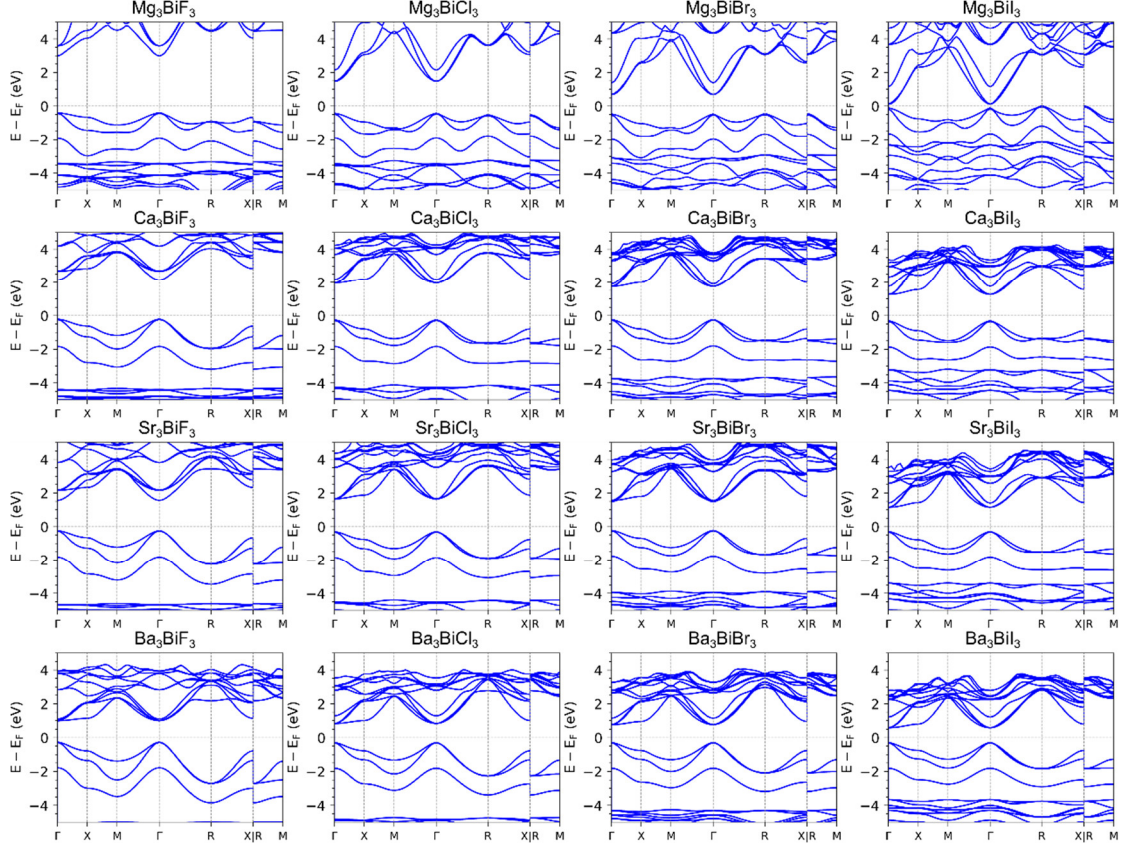

**Figure S10.** Calculated band structures for the  $Pm\text{-}3m$  phase of  $X_3\text{BiA}'_3$  ( $X = \text{Mg}^{2+}, \text{Ca}^{2+}, \text{Sr}^{2+}, \text{Ba}^{2+}$  and  $A' = \text{F}^-, \text{Cl}^-, \text{Br}^-, \text{I}^-$ ), using the HSE06+SOC method.

**Table S1.** The optimized lattice constants, the energy above the convex hull, and HSE06+SOC-calculated band gaps for 38  $X_3\text{BA}'_3$  antiperovskite derivatives ( $E_{\text{hull}} < 80$  meV/atom). The '☑' symbol indicates phonon stability, while the '☒' symbol indicates phonon instability.

| Materials                 | Lattice Constants<br>$a = b = c$ (Å) | $E_{\text{hull}}$<br>(eV/atom) | Phonon Stability | Band Gap<br>(eV) |
|---------------------------|--------------------------------------|--------------------------------|------------------|------------------|
| $\text{Mg}_3\text{NF}_3$  | 4.262                                | 0                              | ☑                | 5.0409           |
| $\text{Ca}_3\text{NF}_3$  | 4.832                                | 0.034                          | ☑                | 3.2542           |
| $\text{Sr}_3\text{NF}_3$  | 5.196                                | 0.064                          | ☑                | 2.1783           |
| $\text{Mg}_3\text{PCL}_3$ | 5.252                                | 0.066                          | ☑                | 3.1906           |
| $\text{Ca}_3\text{PCL}_3$ | 5.715                                | 0                              | ☑                | 2.7968           |
| $\text{Ca}_3\text{PBr}_3$ | 5.901                                | 0                              | ☑                | 2.5659           |
| $\text{Sr}_3\text{PCL}_3$ | 6.056                                | 0                              | ☑                | 2.4904           |
| $\text{Sr}_3\text{PBr}_3$ | 6.233                                | 0                              | ☑                | 2.3205           |
| $\text{Sr}_3\text{PI}_3$  | 6.526                                | 0                              | ☒                | 1.9408           |
| $\text{Ba}_3\text{PCL}_3$ | 6.439                                | 0.037                          | ☑                | 1.6387           |

|                                   |       |       |   |        |
|-----------------------------------|-------|-------|---|--------|
| Ba <sub>3</sub> PBr <sub>3</sub>  | 6.608 | 0     | ☑ | 1.587  |
| Ba <sub>3</sub> PI <sub>3</sub>   | 6.888 | 0     | ☒ | 1.3769 |
| Mg <sub>3</sub> AsCl <sub>3</sub> | 5.330 | 0.074 | ☑ | 2.9758 |
| Ca <sub>3</sub> AsCl <sub>3</sub> | 5.786 | 0     | ☑ | 2.7272 |
| Ca <sub>3</sub> AsBr <sub>3</sub> | 5.964 | 0     | ☑ | 2.4896 |
| Sr <sub>3</sub> AsCl <sub>3</sub> | 6.125 | 0     | ☑ | 2.4261 |
| Sr <sub>3</sub> AsBr <sub>3</sub> | 6.295 | 0     | ☑ | 2.2495 |
| Sr <sub>3</sub> AsI <sub>3</sub>  | 6.578 | 0     | ☒ | 1.8766 |
| Ba <sub>3</sub> AsCl <sub>3</sub> | 6.506 | 0     | ☑ | 1.5959 |
| Ba <sub>3</sub> AsBr <sub>3</sub> | 6.667 | 0     | ☑ | 1.5239 |
| Ba <sub>3</sub> AsI <sub>3</sub>  | 6.937 | 0     | ☒ | 1.3122 |
| Ca <sub>3</sub> SbCl <sub>3</sub> | 5.989 | 0.044 | ☒ | 2.6324 |
| Ca <sub>3</sub> SbBr <sub>3</sub> | 6.142 | 0     | ☑ | 2.4065 |
| Ca <sub>3</sub> SbI <sub>3</sub>  | 6.399 | 0.026 | ☑ | 1.9849 |
| Sr <sub>3</sub> SbCl <sub>3</sub> | 6.324 | 0.031 | ☒ | 2.3638 |
| Sr <sub>3</sub> SbBr <sub>3</sub> | 6.469 | 0     | ☑ | 2.1965 |
| Sr <sub>3</sub> SbI <sub>3</sub>  | 6.717 | 0.018 | ☑ | 1.8567 |
| Ba <sub>3</sub> SbCl <sub>3</sub> | 6.696 | 0.065 | ☒ | 1.5519 |
| Ba <sub>3</sub> SbBr <sub>3</sub> | 6.834 | 0     | ☑ | 1.4835 |
| Ba <sub>3</sub> SbI <sub>3</sub>  | 7.070 | 0.020 | ☑ | 1.2953 |
| Ca <sub>3</sub> BiCl <sub>3</sub> | 6.047 | 0.070 | ☒ | 2.2159 |
| Ca <sub>3</sub> BiBr <sub>3</sub> | 6.197 | 0     | ☑ | 1.9875 |
| Ca <sub>3</sub> BiI <sub>3</sub>  | 6.449 | 0.001 | ☑ | 1.5732 |
| Sr <sub>3</sub> BiCl <sub>3</sub> | 6.382 | 0.073 | ☒ | 1.9222 |
| Sr <sub>3</sub> BiBr <sub>3</sub> | 6.523 | 0     | ☑ | 1.6986 |
| Sr <sub>3</sub> BiI <sub>3</sub>  | 6.766 | 0     | ☑ | 1.4417 |
| Ba <sub>3</sub> BiBr <sub>3</sub> | 6.884 | 0.003 | ☑ | 1.053  |
| Ba <sub>3</sub> BiI <sub>3</sub>  | 7.114 | 0     | ☑ | 0.8675 |

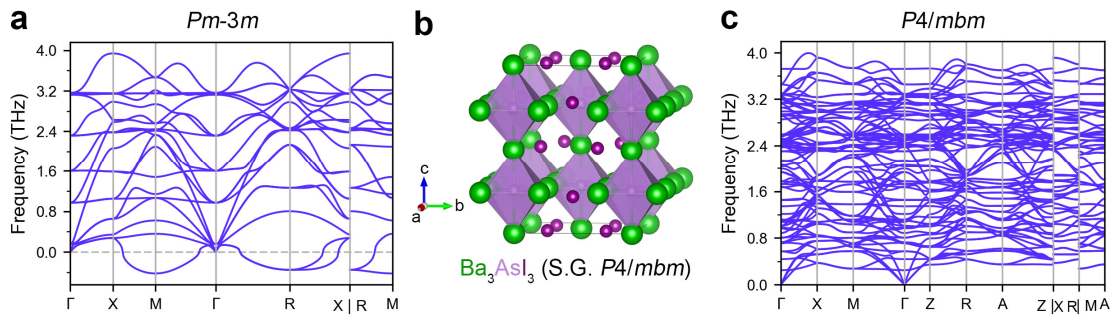

**Figure S11.** (a) Phonon spectra for the  $Pm\text{-}3m$  phase of  $\text{Ba}_3\text{AsI}_3$ , illustrating imaginary frequencies at the M and R points. (b) Crystal structure of the  $P4/mbm$  phase of  $\text{Ba}_3\text{AsI}_3$ . (c) Phonon spectra for  $\text{Ba}_3\text{AsI}_3$  in the  $P4/mbm$  phase.

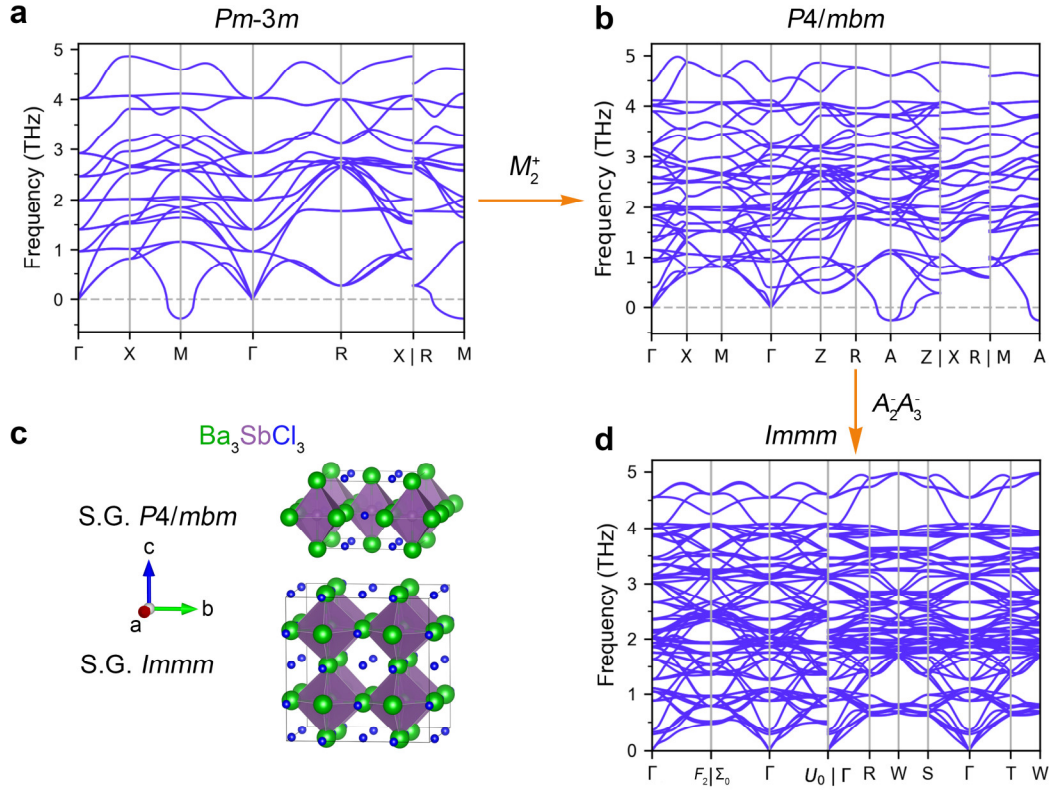

**Figure S12.** (a) Phonon spectra of the  $Pm-3m$  phase of  $\text{Ba}_3\text{SbCl}_3$ , showing imaginary frequencies at the M point. (b) Phonon spectra for the  $P4/mbm$  phase of  $\text{Ba}_3\text{SbCl}_3$ , displaying imaginary frequencies at the A point. (c) Crystal structure of  $\text{Ba}_3\text{SbCl}_3$  in the  $P4/mbm$  and  $Immm$  phases. (d) Phonon spectra for  $\text{Ba}_3\text{SbCl}_3$  in the  $Immm$  phase. Note that the arrows indicate that the structures of the  $P4/mbm$  and  $Immm$  phases are derived from the corresponding imaginary frequency modes.



**Table S2.** Possible low-energy structures of  $\text{Ba}_3\text{PI}_3$  derived from the prototype  $Pm-3m$  phase based on unstable phonon modes. The total energies are presented relative to the energy of the  $Pm-3m$  phase.

| Space group                         | Total energy (meV/f.u.) | irrep                                       |
|-------------------------------------|-------------------------|---------------------------------------------|
| <i>Amm2</i> (No. 38)                | -1.416                  | $\Gamma_4^- (a, a, 0)$                      |
| <i>Cm</i> (No. 8)                   | -0.919                  | $\Gamma_4^- (a, a, b)$                      |
| <i>P1</i> (No. 1)                   | -1.681                  | $\Gamma_4^- (a, b, c)$                      |
| <i>P4mm</i> (No. 99)                | -0.917                  | $\Gamma_4^- (a, 0, 0)$                      |
| <i>Pm</i> (No. 6)                   | -0.915                  | $\Gamma_4^- (a, b, 0)$                      |
| <i>R3m</i> (No. 160)                | -1.641                  | $\Gamma_4^- (a, a, a)$                      |
| <i>Fmmm</i> (No. 69)                | -25.472                 | $R_3^+ (a, b)$                              |
| <i>I4/mcm</i> (No. 140)             | -25.673                 | $R_3^+ (0, a)$                              |
| <i>I4/mmm</i> (No. 139)             | -25.274                 | $R_3^+ (a, 0)$                              |
| <i>P4/mbm</i> (No. 127)             | -33.681                 | $M_2^+ (a; 0; 0)$                           |
| <i>Pmma</i> (No. 51)                | -0.170                  | $X_5^- (a, 0; 0, 0; 0, 0)$                  |
| <i>Cc</i> (No. 9)                   | -25.572                 | $\Gamma_4^- \oplus R_3^+ (a, a, b-0, c)$    |
| <i>Cm</i> (No. 8)                   | -25.556                 | $\Gamma_4^- \oplus R_3^+ (a, a, b-c, 0)$    |
| <i>Fmm2</i> (No. 42)                | -25.350                 | $\Gamma_4^- \oplus R_3^+ (a, 0, 0-b, c)$    |
| <i>Ima2</i> (No. 46)                | -25.675                 | $\Gamma_4^- \oplus R_3^+ (a, a, 0-0, b)$    |
| <i>Imm2</i> (No. 44)                | -25.270                 | $\Gamma_4^- \oplus R_3^+ (a, a, b-0, c)$    |
| <i>Amm2</i> (No. 38)                | -33.795                 | $\Gamma_4^- \oplus M_2^+ (a, 0, 0-b; 0; 0)$ |
| <i>Cm</i> (No. 8)                   | -33.682                 | $\Gamma_4^- \oplus M_2^+ (a, b, 0-0; c; 0)$ |
| <i>P4bm</i> (No. 100)               | -33.681                 | $\Gamma_4^- \oplus M_2^+ (a, 0, 0-0; 0; b)$ |
| <i>Pc</i> (No. 7)                   | -33.796                 | $\Gamma_4^- \oplus M_2^+ (a, a, b-c; 0; 0)$ |
| <i>Pmc2<sub>1</sub></i> (No. 26)    | -33.796                 | $\Gamma_4^- \oplus M_2^+ (a, a, 0-b; 0; 0)$ |
| <i>Cmmm</i> (No. 65)                | -57.140                 | $M_2^+ \oplus R_3^+ (a; 0; 0-b, c)$         |
| <i>P4<sub>2</sub>/mnm</i> (No. 136) | -33.759                 | $M_2^+ \oplus R_3^+ (a; 0; 0-b, 0)$         |
| <i>P4/mbm</i> (No. 127)             | -57.325                 | $M_2^+ \oplus R_3^+ (a; 0; 0-0, b)$         |

**Table S3.** Possible low-energy structures of  $\text{Ba}_3\text{AsI}_3$  derived from the prototype  $Pm-3m$  phase based on unstable phonon modes. The total energies are presented relative to the energy of the  $Pm-3m$  phase.

| Space group                         | Total energy (meV/f.u.) | irrep                               |
|-------------------------------------|-------------------------|-------------------------------------|
| <i>Fmmm</i> (No. 69)                | -8.555                  | $R_3^+ (a, b)$                      |
| <i>I4/mcm</i> (No. 140)             | -8.782                  | $R_3^+ (0, a)$                      |
| <i>I4/mmm</i> (No. 139)             | -8.780                  | $R_3^+ (a, 0)$                      |
| <i>P4/mbm</i> (No. 127)             | -13.675                 | $M_2^+ (a; 0; 0)$                   |
| <i>Cmmm</i> (No. 65)                | -21.655                 | $M_2^+ \oplus R_3^+ (a; 0; 0-b, c)$ |
| <i>P4<sub>2</sub>/mnm</i> (No. 136) | -13.652                 | $M_2^+ \oplus R_3^+ (a; 0; 0-b, 0)$ |
| <i>P4/mbm</i> (No. 127)             | -21.662                 | $M_2^+ \oplus R_3^+ (a; 0; 0-0, b)$ |

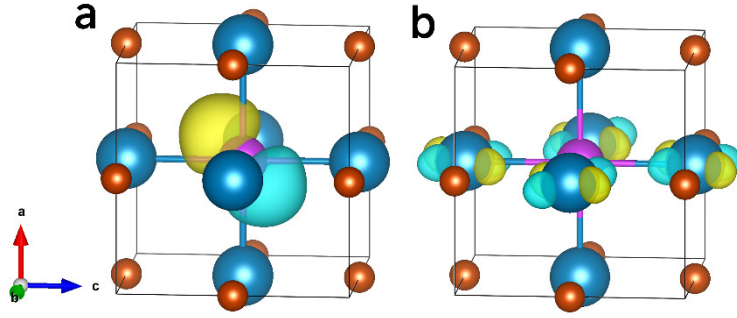

**Figure S13.** Calculated isosurfaces of wave functions in real space for (a) VBM and (b) CBM of  $\text{Ba}_3\text{BiBr}_3$ .

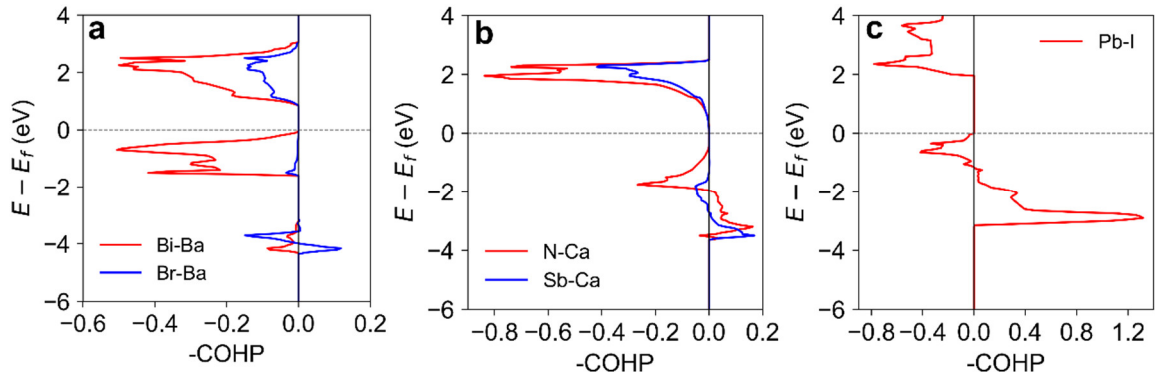

**Figure S14.** Crystal orbital Hamilton population (COHP) analysis for (a)  $\text{Ba}_3\text{BiBr}_3$ , (b)  $\text{Ca}_3\text{NSb}$ , and (c)  $\text{CsPbI}_3$ .

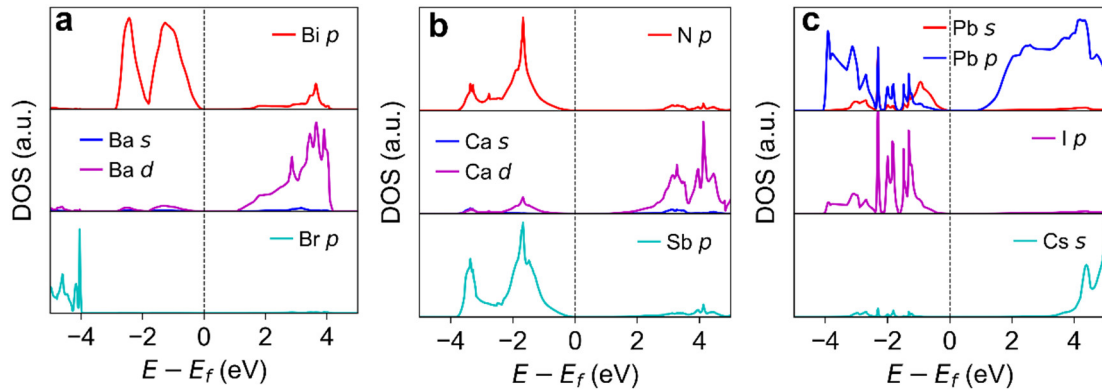

**Figure S15.** Orbital-projected electronic density of states (DOS) for (a)  $\text{Ba}_3\text{BiBr}_3$ , (b)  $\text{Ca}_3\text{NSb}$ , and (c)  $\text{CsPbI}_3$ , obtained using the HSE06+SOC method. The valence band maximum (VBM) is set to zero eV.

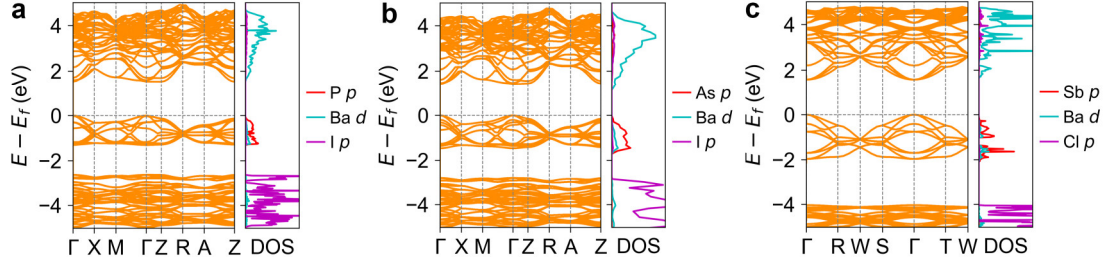

**Figure S16.** Electronic band structure and orbital-projected electronic density of states (DOS) for (a) tetragonal  $P4/mbm$   $Ba_3PI_3$ , (b) tetragonal  $P4/mbm$   $Ba_3AsI_3$ , and (c) orthorhombic  $Immm$   $Ba_3SbCl_3$ , calculated using the HSE06+SOC method. The valence band maximum (VBM) is set to zero eV.

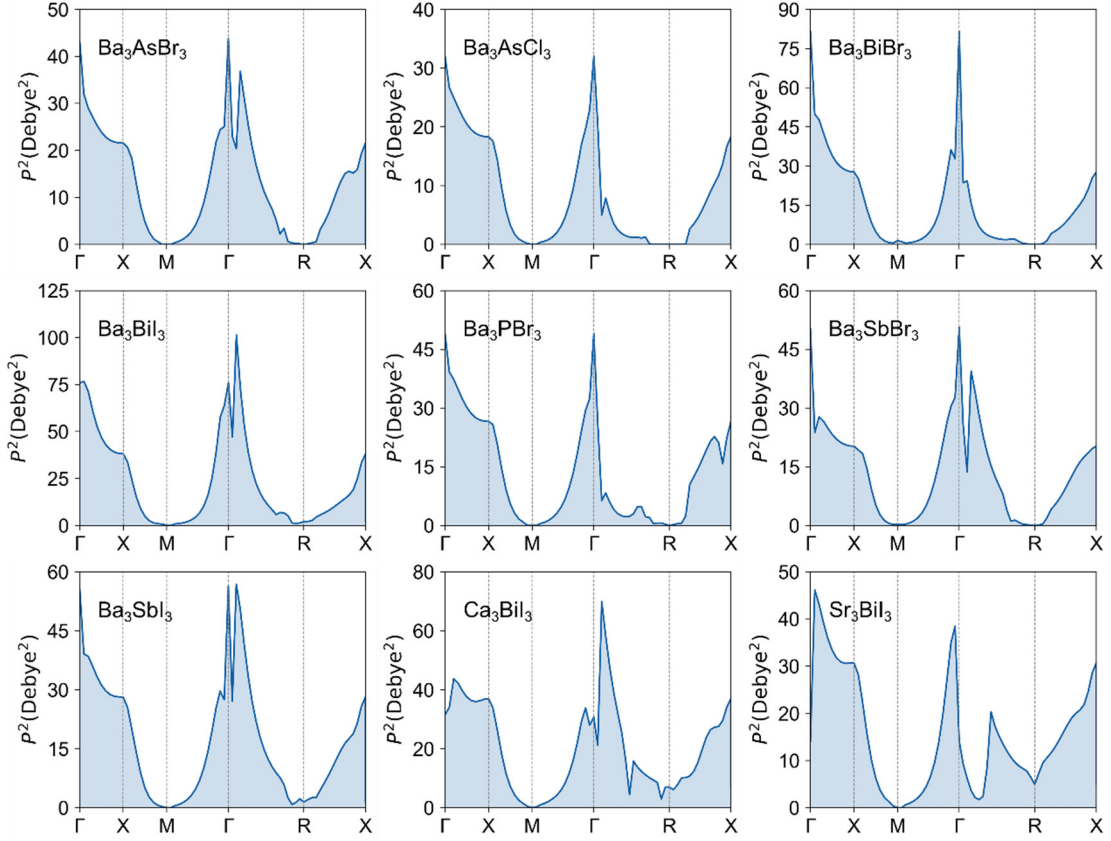

**Figure S17.** The squares of the transition dipole matrix elements ( $P^2$ ) between the VBM and the CBM along different high-symmetry directions for the nine antiperovskite derivatives, calculated using the HSE06+SOC method.

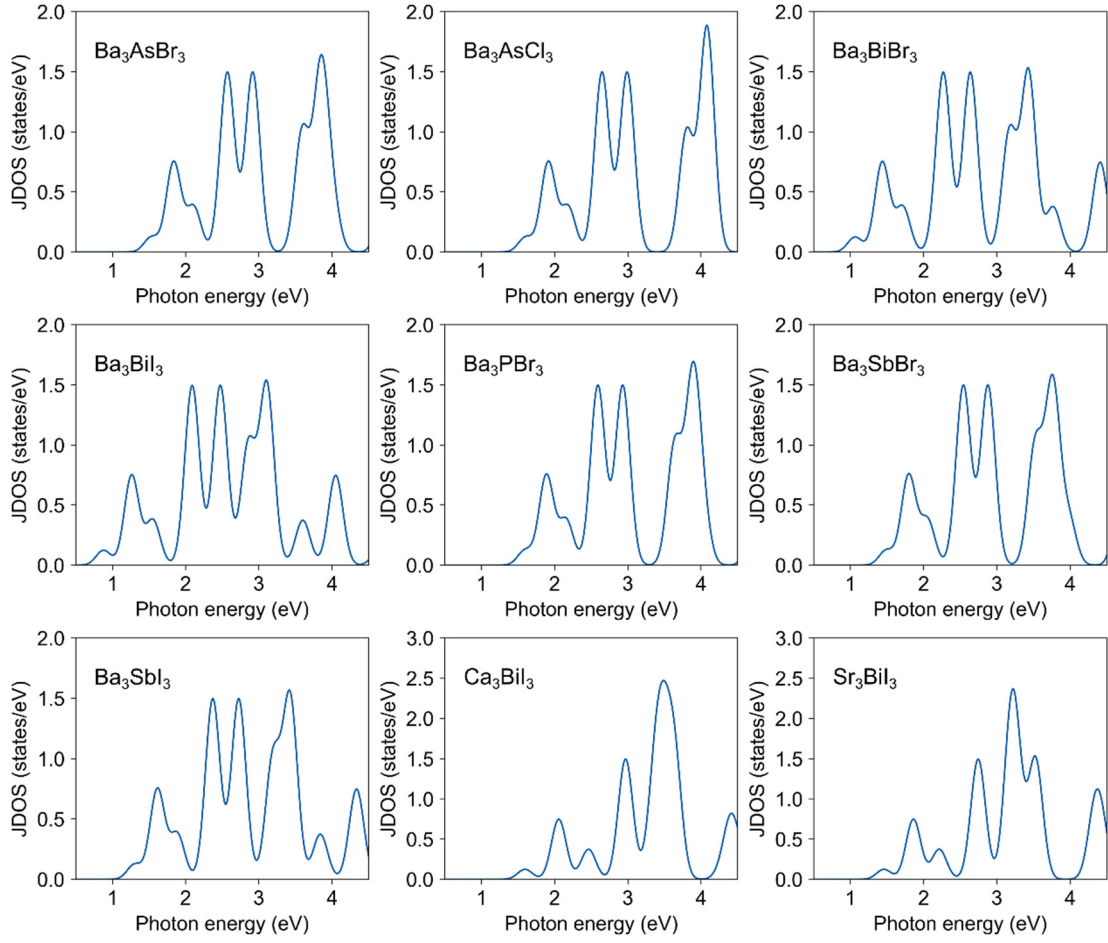

**Figure S18.** The calculated joint density of states (JDOS) for the nine antiperovskite derivatives, obtained through the HSE06+SOC method.

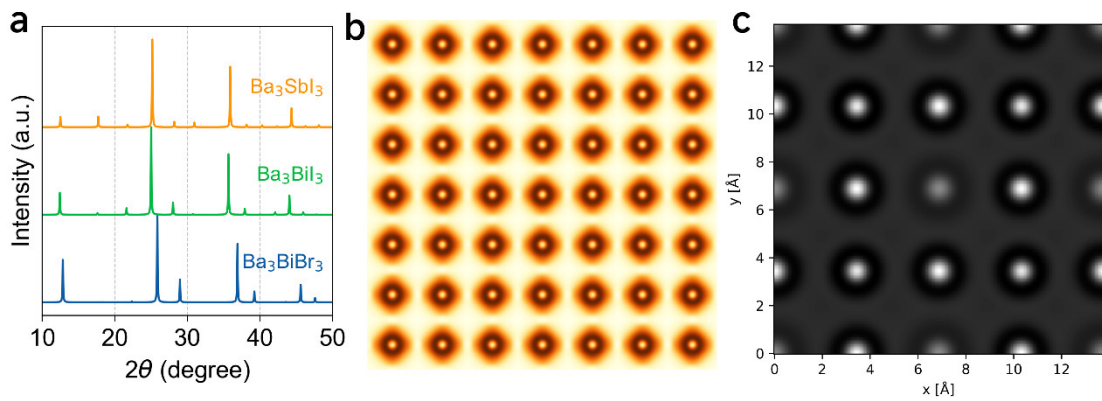

**Figure S19.** (a) Simulated XRD patterns of  $\text{Ba}_3\text{BiBr}_3$ ,  $\text{Ba}_3\text{BiI}_3$ , and  $\text{Ba}_3\text{SbI}_3$ ; (b) simulated STM image of  $\text{Ba}_3\text{BiBr}_3$ ; and (c) simulated HRTEM image of  $\text{Ba}_3\text{BiBr}_3$ .

**Table S4.** Top 13 candidate materials predicted by XGBoost models with  $E_{\text{hull}} < 80$  meV/atom and  $0.8 \text{ eV} < E_g < 1.6 \text{ eV}$ .

| Candidate Material                                       | Predicted $E_{\text{hull}}$ (meV/atom) | Predicted $E_g$ (eV) |
|----------------------------------------------------------|----------------------------------------|----------------------|
| $\text{Ba}_3(\text{P}_{0.5}\text{As}_{0.5})\text{Cl}_3$  | -19.44                                 | 1.58                 |
| $\text{Ba}_3(\text{P}_{0.5}\text{As}_{0.5})\text{Br}_3$  | -10.26                                 | 1.41                 |
| $\text{Ba}_3(\text{P}_{0.5}\text{As}_{0.5})\text{I}_3$   | -10.26                                 | 1.25                 |
| $\text{Ba}_3(\text{As}_{0.5}\text{Bi}_{0.5})\text{Br}_3$ | 2.84                                   | 1.08                 |
| $\text{Ba}_3(\text{As}_{0.5}\text{Bi}_{0.5})\text{I}_3$  | 2.84                                   | 0.84                 |
| $\text{Sr}_3(\text{As}_{0.5}\text{Bi}_{0.5})\text{I}_3$  | 5.29                                   | 1.43                 |
| $\text{Ca}_3(\text{As}_{0.5}\text{Bi}_{0.5})\text{I}_3$  | 9.87                                   | 1.53                 |
| $\text{Ba}_3(\text{As}_{0.5}\text{Sb}_{0.5})\text{Br}_3$ | 15.70                                  | 1.46                 |
| $\text{Ba}_3(\text{As}_{0.5}\text{Sb}_{0.5})\text{I}_3$  | 15.70                                  | 1.32                 |
| $\text{Ba}_3(\text{P}_{0.5}\text{Bi}_{0.5})\text{Cl}_3$  | 32.86                                  | 1.18                 |
| $\text{Ba}_3(\text{P}_{0.5}\text{Sb}_{0.5})\text{Cl}_3$  | 45.73                                  | 1.57                 |
| $\text{Ba}_3(\text{P}_{0.5}\text{Bi}_{0.5})\text{Br}_3$  | 47.09                                  | 0.94                 |
| $\text{Ba}_3(\text{P}_{0.5}\text{Sb}_{0.5})\text{Br}_3$  | 59.96                                  | 1.32                 |
| $\text{Ba}_3(\text{P}_{0.5}\text{Sb}_{0.5})\text{I}_3$   | 59.96                                  | 1.16                 |

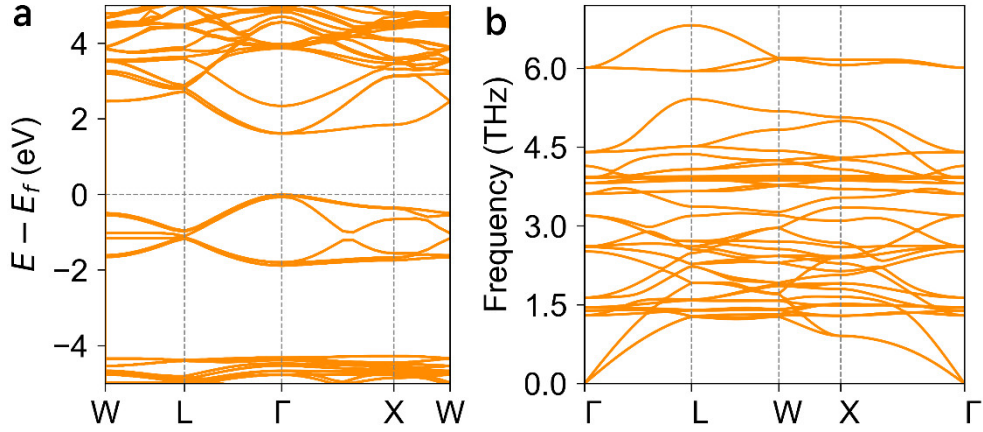

**Figure S20.** (a) Calculated band structures obtained through the HSE06+SOC method for  $\text{Ba}_3(\text{P}_{0.5}\text{As}_{0.5})\text{Cl}_3$ , and (b) phonon dispersion for  $\text{Ba}_3(\text{P}_{0.5}\text{As}_{0.5})\text{Cl}_3$ .

**Table S5.** Materials parameters used to compute transport properties.  $C$  is the elastic tensor in Voigt notation (unit: GPa);  $\epsilon_s$  and  $\epsilon_\infty$  are the static and high-frequency dielectric constants in  $\epsilon_0$ ;  $D_{vb}$  and  $D_{cb}$  are the absolute deformation potentials at the valence and conduction band edge, respectively;  $\omega_{po}$  is the effective polar phonon frequency (unit: THz).

| Material                          | $C_{11}$ | $C_{44}$ | $C_{12}$ | $\epsilon_{s,11}$ | $\epsilon_{s,22}$ | $\epsilon_{s,33}$ | $\epsilon_{\infty,11}$ | $\epsilon_{\infty,22}$ | $\epsilon_{\infty,33}$ | $D_{vb,11}$ | $D_{vb,22}$ | $D_{vb,33}$ | $D_{cb,11}$ | $D_{cb,22}$ | $D_{cb,33}$ | $\omega_{po}$ |
|-----------------------------------|----------|----------|----------|-------------------|-------------------|-------------------|------------------------|------------------------|------------------------|-------------|-------------|-------------|-------------|-------------|-------------|---------------|
| Ba <sub>3</sub> BiBr <sub>3</sub> | 51.66    | 7.95     | 5.84     | 14.06             | 14.06             | 14.06             | 5.54                   | 5.54                   | 5.54                   | 1.64        | 1.64        | 1.64        | 2.72        | 2.72        | 2.72        | 2.34          |
| Ba <sub>3</sub> BiI <sub>3</sub>  | 48.15    | 6.69     | 5.12     | 13.18             | 13.18             | 13.18             | 6.34                   | 6.34                   | 6.34                   | 1.18        | 1.18        | 1.18        | 3.10        | 3.10        | 3.10        | 2.14          |
| Ba <sub>3</sub> SbI <sub>3</sub>  | 50.25    | 6.96     | 5.41     | 13.13             | 13.13             | 13.13             | 5.90                   | 5.90                   | 5.90                   | 1.06        | 1.06        | 1.06        | 3.26        | 3.26        | 3.26        | 2.33          |

**Table S6.** Primary features for machine learning.

|    | Primary features                    | Abbreviation   |
|----|-------------------------------------|----------------|
| 1  | Atomic number                       | Z              |
| 2  | Atomic weight                       | A <sub>r</sub> |
| 3  | Period number                       | P              |
| 4  | Group number                        | G              |
| 5  | Atomic radius                       | $r^a$          |
| 6  | Covalent radius                     | $r^c$          |
| 7  | Ionic radius                        | $r^i$          |
| 8  | Crystal radius                      | $r^m$          |
| 9  | Pauling electronegativity           | $\chi^P$       |
| 10 | Allred-Rockow electronegativity     | $\chi^{AR}$    |
| 11 | Mulliken electronegativity          | $\chi^M$       |
| 12 | Martinov-Batsanov electronegativity | $\chi^{MB}$    |
| 13 | Gordy electronegativity             | $\chi^G$       |
| 14 | Number of valence electrons         | N <sub>e</sub> |
| 15 | Density of element                  | $\rho$         |

**Table S7.** The optimized hyperparameters of XGBoost algorithm.

| Model      | Hyperparameter   | Value |
|------------|------------------|-------|
| $E_g$      | n_estimators     | 461   |
|            | learning_rate    | 0.435 |
|            | max_depth        | 2     |
|            | min_child_weight | 1     |
|            | n_estimators     | 456   |
| $E_{hull}$ | learning_rate    | 0.500 |
|            | max_depth        | 4     |
|            | min_child_weight | 10    |

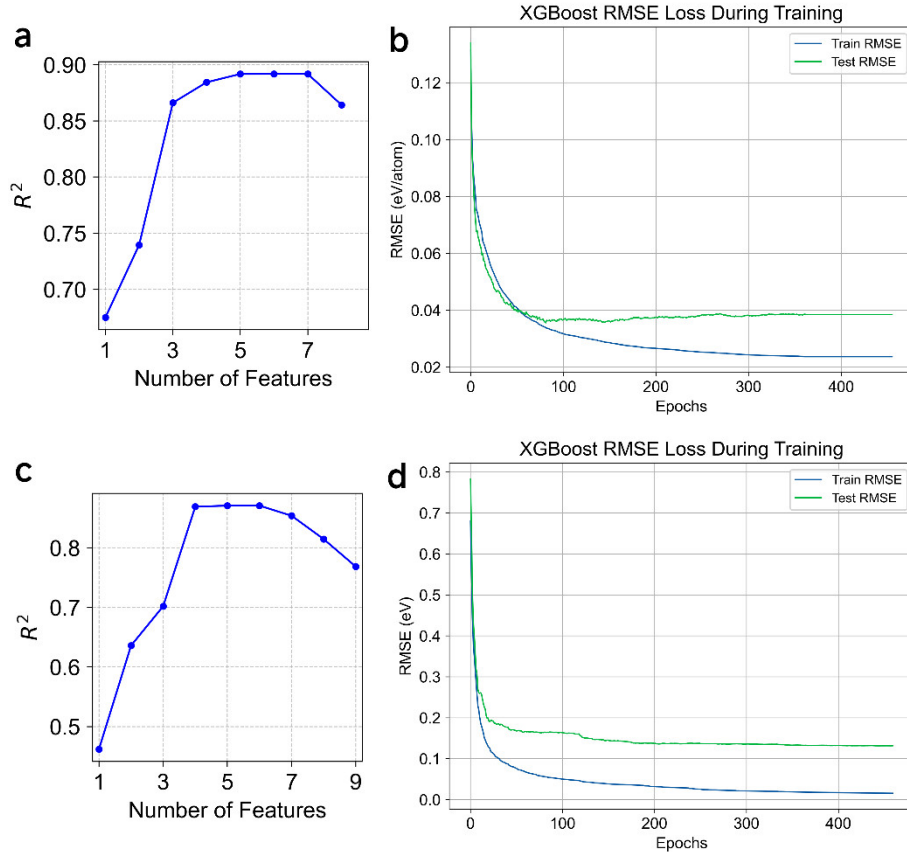

**Figure S21.**  $R^2$  scores from 5-fold cross-validation of the sequential forward selection (SFS) results for the XGBoost model of (a)  $E_{\text{hull}}$  and (c)  $E_g$ . Loss function of the XGBoost model for (b)  $E_{\text{hull}}$  and (d)  $E_g$  across each epoch on the training and test datasets.

## Reference:

- 1 W. Rahim, J. M. Skelton, C. N. Savory, I. R. Evans, J. S. O. Evans, A. Walsh and D. O. Scanlon, Polymorph exploration of bismuth stannate using first-principles phonon mode mapping, *Chem. Sci.*, 2020, **11**(30), 7904–7909.
- 2 A. Togo and I. Tanaka, Evolution of crystal structures in metallic elements, *Phys. Rev. B*, 2013, **87**(18), 184104.
- 3 L. Ward, A. Agrawal, A. Choudhary and C. Wolverton, A general-purpose machine learning framework for predicting properties of inorganic materials, *npj Comput. Mater.*, 2016, **2**(1), 16028.
- 4 Y.-H. Wang, Y.-F. Zhang, Y. Zhang, Z.-F. Gu, Z.-Y. Zhang, H. Lin and K.-J. Deng, Identification of adaptor proteins using the ANOVA feature selection technique, *Methods*, 2022, **208**, 42–47.
- 5 F. Pedregosa, G. Varoquaux, A. Gramfort, V. Michel, B. Thirion, O. Grisel, M. Blondel, P. Prettenhofer, R. Weiss, V. Dubourg, Scikit-learn: Machine learning in Python, *J. Mach. Learn. Res.*, 2011, **12**, 2825–2830.

- 6 Y. Liu, Y. Mu, K. Chen, Y. Li and J. Guo, Daily activity feature selection in smart homes based on pearson correlation coefficient, *Neural Process Lett.*, 2020, **51**, 1771–1787.
- 7 S. Raschka, MLxtend: Providing machine learning and data science utilities and extensions to Python’s scientific computing stack, *J. open source softw.*, 2018, **3**(24), 638.
- 8 T. Chen and C. Guestrin, Xgboost: A scalable tree boosting system, *Proceedings of the 22nd ACM SIGKDD International Conference on Knowledge Discovery and Data Mining*, 2016, 785–794. ACM, New York, NY USA.
- 9 J. Gong, S. Chu, R. K. Mehta and A. J. H. McGaughey, XGBoost model for electrocaloric temperature change prediction in ceramics, *npj Comput. Mater.*, 2022, **8**(1), 140.
- 10 E. Ren and F.-X. Coudert, Enhancing gas separation selectivity prediction through geometrical and chemical descriptors, *Chem. Mater.*, 2023, **35**(17), 6771–6781.
- 11 R. Jacobs, J. Liu, H. Abernathy and D. Morgan, Machine learning design of perovskite catalytic properties, *Adv. Energy Mater.*, 2024, **14**(12), 2303684.
- 12 A. D. Smith, S. B. Harris, R. P. Camata, D. Yan and C.-C. Chen, Machine learning the relationship between Debye temperature and superconducting transition temperature, *Phys. Rev. B*, 2023, **108**(17), 174514.
- 13 N. K. Barua, A. Golabek, A. O. Oliynyk and H. Kleinke, Experimentally validated machine learning predictions of ultralow thermal conductivity for SnSe materials, *J. Mater. Chem. C*, 2023, **11**(34), 11643–11652.
- 14 N. Fernando, Bayesian Optimization: Open source constrained global optimization tool for Python. <https://github.com/bayesian-optimization/BayesianOptimization>, 2014.
- 15 R. Ouyang, S. Curtarolo, E. Ahmetcik, M. Scheffler and L. M. Ghiringhelli, SISSO: A compressed-sensing method for identifying the best low-dimensional descriptor in an immensity of offered candidates, *Phys. Rev. Mater.*, 2018, **2**(8), 083802.
- 16 H. W. Kuhn, A. W. Tucker, Contributions to the theory of games. Princeton University Press, 1953.
